# Supplementary material for: Antibacterial Effect of 16 Essential Oils and Modulation of mex Efflux Pumps Gene Expression on Multidrug-Resistant Pseudomonas aeruginosa Clinical Isolates: Is Cinnamon a Good Fighter?
Source: MDPI journal article supplement (doi:10.3390/antibiotics12010163), 2023-01-12
Supplement: s1 [file s1]

|    |    |             |         |    |      |      |   |   |   |   |   |   |    |     |      |    |     |     |   |   |   |
|----|----|-------------|---------|----|------|------|---|---|---|---|---|---|----|-----|------|----|-----|-----|---|---|---|
| 32 | 32 | 0.05        | 0.05    | 9  | -    | -    | 6 | - | - | 6 | - | - | 6  | -   | -    | 6  | -   | -   | 6 | - | - |
| 33 | 19 | 0.025       | 0.025   | 6  | -    | -    | 6 | - | - | 6 | - | - | 6  | -   | -    | 6  | -   | -   | 6 | - | - |
| 34 | 22 | <0.012<br>5 | <0.0125 | 6  | -    | -    | 6 | - | - | 6 | - | - | 6  | -   | -    | 6  | -   | -   | 6 | - | - |
| 36 | 30 | 0.025       | 0.025   | 6  | -    | -    | 6 | - | - | 6 | - | - | 6  | -   | -    | 6  | -   | -   | 6 | - | - |
| 38 | 21 | <0.012<br>5 | <0.0125 | 6  | -    | -    | 6 | - | - | 6 | - | - | 6  | -   | -    | 6  | -   | -   | 6 | - | - |
| 39 | 19 | <0.012<br>5 | <0.0125 | 6  | -    | -    | 6 | - | - | 6 | - | - | 6  | -   | -    | 6  | -   | -   | 6 | - | - |
| 41 | 18 | <0.012<br>5 | <0.0125 | 6  | -    | -    | 6 | - | - | 6 | - | - | 6  | -   | -    | 6  | -   | -   | 6 | - | - |
| 44 | 28 | <0.012<br>5 | <0.0125 | 6  | -    | -    | 6 | - | - | 6 | - | - | 6  | -   | -    | 6  | -   | -   | 6 | - | - |
| 47 | 21 | 0.025       | 0.025   | 6  | -    | -    | 6 | - | - | 6 | - | - | 6  | -   | -    | 11 | >25 | >25 | 6 | - | - |
| 48 | 28 | <0.012<br>5 | 0.05    | 6  | -    | -    | 6 | - | - | 6 | - | - | 6  | -   | -    | 6  | -   | -   | 6 | - | - |
| 49 | 24 | <0.012<br>5 | 0.2     | 6  | -    | -    | 6 | - | - | 6 | - | - | 6  | -   | -    | 6  | -   | -   | 6 | - | - |
| 50 | 25 | <0.012<br>5 | <0.0125 | 6  | -    | -    | 6 | - | - | 6 | - | - | 6  | -   | -    | 6  | -   | -   | 6 | - | - |
| 51 | 25 | <0.012<br>5 | <0.0125 | 6  | -    | -    | 6 | - | - | 6 | - | - | 6  | -   | -    | 6  | -   | -   | 6 | - | - |
| 52 | 27 | 0.025       | 0.025   | 6  | -    | -    | 6 | - | - | 6 | - | - | 6  | -   | -    | 10 | >25 | >25 | 6 | - | - |
| 53 | 26 | 0.025       | 0.025   | 26 | >25  | >25  | 6 | - | - | 6 | - | - | 6  | -   | -    | 10 | >25 | >25 | 6 | - | - |
| 56 | 24 | 0.05        | 0.05    | 6  | -    | -    | 6 | - | - | 6 | - | - | 6  | -   | -    | 6  | -   | -   | 6 | - | - |
| 58 | 21 | 0.05        | 0.025   | 14 | >25  | >25  | 6 | - | - | 6 | - | - | 6  | -   | -    | 6  | -   | -   | 6 | - | - |
| 59 | 22 | 0.05        | <0.025  | 6  | -    | -    | 6 | - | - | 6 | - | - | 6  | -   | -    | 6  | -   | -   | 6 | - | - |
| 60 | 22 | 0.05        | 0.05    | 6  | -    | -    | 6 | - | - | 6 | - | - | 6  | -   | -    | 6  | -   | -   | 6 | - | - |
| 61 | 24 | 0.025       | 0.025   | 6  | -    | -    | 6 | - | - | 6 | - | - | 6  | -   | -    | 6  | -   | -   | 6 | - | - |
| 62 | 17 | 0.05        | 0.025   | 6  | -    | -    | 6 | - | - | 6 | - | - | 6  | -   | -    | 6  | -   | -   | 6 | - | - |
| 64 | 26 | 0.05        | 0.05    | 6  | -    | -    | 6 | - | - | 6 | - | - | 6  | -   | -    | 6  | -   | -   | 6 | - | - |
| 67 | 24 | <0.012<br>5 | <0.0125 | 22 | 1.56 | 1.56 | 6 | - | - | 6 | - | - | 6  | -   | -    | 6  | -   | -   | 6 | - | - |
| 68 | 21 | <0.012<br>5 | 0.025   | 16 | >25  | >25  | 6 | - | - | 6 | - | - | 6  | -   | -    | 6  | -   | -   | 6 | - | - |
| 71 | 14 | 0.025       | 0.025   | 6  | -    | -    | 6 | - | - | 6 | - | - | 6  | -   | -    | 6  | -   | -   | 6 | - | - |
| 72 | 30 | <0.012<br>5 | 0.05    | 6  | -    | -    | 6 | - | - | 6 | - | - | 6  | -   | -    | 6  | -   | -   | 6 | - | - |
| 73 | 18 | <0.012<br>5 | <0.0125 | 6  | -    | -    | 6 | - | - | 6 | - | - | 14 | 0.2 | 0.78 | 6  | -   | -   | 6 | - | - |

|     |    |             |         |    |     |     |    |      |      |    |     |     |    |      |      |   |   |   |    |      |      |
|-----|----|-------------|---------|----|-----|-----|----|------|------|----|-----|-----|----|------|------|---|---|---|----|------|------|
| 74  | 16 | <0.012<br>5 | <0.0125 | 6  | -   | -   | 6  | -    | -    | 6  | -   | -   | 6  | -    | -    | 6 | - | - | 6  | -    | -    |
| 75  | 30 | <0.012<br>5 | <0.0125 | 17 | >25 | >25 | 6  | -    | -    | 6  | -   | -   | 6  | -    | -    | 6 | - | - | 6  | -    | -    |
| 76  | 26 | 0.05        | 0.05    | 24 | >25 | >25 | 6  | -    | -    | 6  | -   | -   | 6  | -    | -    | 6 | - | - | 12 | >25  | >25  |
| 77  | 28 | 0.05        | 0.05    | 20 | >25 | >25 | 6  | -    | -    | 12 | >25 | >25 | 6  | -    | -    | 6 | - | - | 6  | >25  | >25  |
| 78  | 24 | 0.025       | <0.0125 | 6  | -   | -   | 6  | -    | -    | 6  | -   | -   | 6  | -    | -    | 6 | - | - | 8  | -    | -    |
| 80  | 32 | <0.012<br>5 | <0.0125 | 8  | -   | -   | 6  | -    | -    | 6  | -   | -   | 6  | -    | -    | 6 | - | - | 6  | -    | -    |
| 82  | 26 | <0.012<br>5 | 0.05    | 6  | -   | -   | 6  | -    | -    | 6  | -   | -   | 6  | -    | -    | 6 | - | - | 6  | -    | -    |
| 83  | 18 | <0.012<br>5 | <0.0125 | 6  | -   | -   | 6  | -    | -    | 6  | -   | -   | 6  | -    | -    | 6 | - | - | 6  | -    | -    |
| 84  | 48 | <0.012<br>5 | <0.0125 | 50 | >25 | >25 | 11 | 12.5 | 12.5 | 23 | 0.2 | 0.2 | 11 | 0.39 | 0.39 | 6 | - | - | 11 | 0.39 | 0.39 |
| 88  | 26 | <0.012<br>5 | <0.0125 | 17 | >25 | >25 | 6  | -    | -    | 6  | -   | -   | 6  | -    | -    | 6 | - | - | 6  | -    | -    |
| 90  | 24 | 0.025       | 0.025   | 6  | -   | -   | 6  | -    | -    | 6  | -   | -   | 6  | -    | -    | 6 | - | - | 6  | -    | -    |
| 102 | 24 | <0.012<br>5 | <0.0125 | 6  | -   | -   | 6  | -    | -    | 6  | -   | -   | 6  | -    | -    | 6 | - | - | 12 | >25  | >25  |
| 128 | 25 | 0.025       | 0.025   | 30 | >25 | >25 | 6  | -    | -    | 6  | -   | -   | 6  | -    | -    | 6 | - | - | 6  | -    | -    |
| 141 | 30 | 0.05        | 0.05    | 6  | -   | -   | 6  | -    | -    | 6  | -   | -   | 6  | -    | -    | 6 | - | - | 14 | >25  | >25  |
| 142 | 19 | 0.025       | 0.025   | 6  | -   | -   | 6  | -    | -    | 6  | -   | -   | 6  | -    | -    | 6 | - | - | 6  | -    | -    |
| 145 | 24 | 0.05        | 0.05    | 20 | >25 | >25 | 6  | -    | -    | 6  | -   | -   | 6  | -    | -    | 6 | - | - | 6  | -    | -    |
| 150 | 44 | <0.012<br>5 | <0.0125 | 38 | >25 | >25 | 6  | -    | -    | 6  | -   | -   | 13 | 0.2  | 0.2  | 6 | - | - | 13 | 0.05 | 0.05 |
| 151 | 26 | 0.025       | 0.025   | 27 | >25 | >25 | 6  | -    | -    | 6  | -   | -   | 6  | -    | -    | 6 | - | - | 6  | -    | -    |
| 152 | 25 | <0.012<br>5 | <0.0125 | 6  | -   | -   | 6  | -    | -    | 6  | -   | -   | 6  | -    | -    | 6 | - | - | 6  | -    | -    |
| 153 | 21 | 0.05        | 0.05    | 20 | >25 | >25 | 6  | -    | -    | 12 | >25 | >25 | 6  | -    | -    | 6 | - | - | 11 | >25  | >25  |
| 154 | 20 | 0.05        | 0.05    | 26 | >25 | >25 | 6  | -    | -    | 6  | -   | -   | 6  | -    | -    | 6 | - | - | 12 | 6.25 | 6.25 |
| 160 | 30 | 0.025       | 0.025   | 6  | -   | -   | 6  | -    | -    | 6  | -   | -   | 6  | -    | -    | 6 | - | - | 6  | -    | -    |

KB Ø- Kirby Bauer method diameter (millimeters); MIC- minimal inhibitory concentration; MBC-minimum bactericidal concentration.
